# Supplementary material for: Genetic Evaluation of Water Use Efficiency and Nutrient Use Efficiency in Populus deltoides Bartr. ex Marsh. Seedlings in China
Source: MDPI journal article supplement (doi:10.3390/plants13162228), 2024-08-11
Supplement: s1 [file plants-3111329-supplementary.pdf › plants-3111329-supplementary.pdf]

Supplementary Materials:

**Table S1.** Information of provenances and genotypes of *P. deltoides*.

| Numb<br>er | Provena<br>nce | Genotype<br>number |
|------------|----------------|--------------------|------------|----------------|--------------------|------------|----------------|--------------------|------------|----------------|--------------------|
| 1          | AM             | 484                | 65         | AQ             | 174-3-4            | 129        | AQ             | 178-2-195          | 193        | AL             | LA07-N35           |
| 2          | AM             | 489                | 66         | AQ             | 174-3-5            | 130        | AQ             | 178-2-198          | 194        | AL             | LA07-N45           |
| 3          | AM             | 491                | 67         | AQ             | 174-3-6            | 131        | AQ             | 179-1              | 195        | AL             | LA07-N55           |
| 4          | AM             | 494                | 68         | AQ             | 174-3-7            | 132        | AQ             | 179-2              | 196        | AL             | LA07-N6            |
| 5          | AM             | 495                | 69         | AQ             | 174-3-8            | 133        | AQ             | 179-3              | 197        | AL             | LA08-N1            |
| 6          | AM             | 499                | 70         | AQ             | 174-3-10           | 134        | AQ             | 179-4              | 198        | AL             | LA08-N21           |
| 7          | AM             | 500                | 71         | AQ             | 174-3-11           | 135        | AQ             | 179-6              | 199        | AL             | LA08-N3            |
| 8          | AM             | 501                | 72         | AQ             | 174-3-12           | 136        | AQ             | 179-7              | 200        | AL             | LA08-N4            |
| 9          | AM             | 503                | 73         | AQ             | 174-3-13           | 137        | AQ             | 179-9              | 201        | AL             | LA08-N52           |
| 10         | AM             | 504                | 74         | AQ             | 174-3-15           | 138        | AQ             | 179-10             | 202        | AL             | LA09-N1            |
| 11         | AM             | 508                | 75         | AQ             | 175-1-1            | 139        | AQ             | 180-1              | 203        | AL             | LA09-N23           |
| 12         | AI             | 5006               | 76         | AQ             | 175-1-2            | 140        | AQ             | 180-3              | 204        | AL             | LA09-N31           |
| 13         | AI             | 5007               | 77         | AQ             | 175-1-3            | 141        | AQ             | 180-4              | 205        | AL             | LA09-N59           |
| 14         | AI             | 5008               | 78         | AQ             | 175-1-4            | 142        | AQ             | 180-8              | 206        | AT             | TN01-27            |
| 15         | AI             | 5009               | 79         | AQ             | 176-3-2            | 143        | AQ             | 180-9              | 207        | AT             | TN01-54            |
| 16         | AI             | 5010               | 80         | AQ             | 176-3-3            | 144        | AQ             | 180-11             | 208        | AT             | TN01-65            |
| 17         | AI             | 5012               | 81         | AQ             | 177-3-8            | 145        | AQ             | 180-12             | 209        | AT             | TN01-71            |
| 18         | AI             | 5013               | 82         | AQ             | 177-3-9            | 146        | AQ             | 180-16             | 210        | AT             | TN01-79            |
| 19         | AI             | 5014               | 83         | AQ             | 178-2-7            | 147        | AQ             | 180-17             | 211        | AT             | TN01-88            |
| 20         | AI             | 5015               | 84         | AQ             | 178-2-8            | 148        | AQ             | 180-18             | 212        | AT             | TN01-92            |
| 21         | AI             | 5036               | 85         | AQ             | 178-2-9            | 149        | AQ             | 180-25             | 213        | AT             | TN01-N43           |

|    |    |         |     |    |           |     |    |          |     |    |          |
|----|----|---------|-----|----|-----------|-----|----|----------|-----|----|----------|
| 22 | AI | 5037    | 86  | AQ | 178-2-15  | 150 | AQ | 180-28   | 214 | AT | TN01-N50 |
| 23 | AI | 5038    | 87  | AQ | 178-2-16  | 151 | AQ | 180-30   | 215 | AT | TN01-N58 |
| 24 | AI | 5039    | 88  | AQ | 178-2-17  | 152 | AQ | 180-31   | 216 | AT | TN02-112 |
| 25 | AI | 5040    | 89  | AQ | 178-2-18  | 153 | AQ | 180-34   | 217 | AT | TN02-117 |
| 26 | AI | 5041    | 90  | AQ | 178-2-21  | 154 | AQ | 180-36   | 218 | AT | TN02-16  |
| 27 | AI | 5042    | 91  | AQ | 178-2-29  | 155 | AQ | 180-38   | 219 | AT | TN02-34  |
| 28 | AI | 5043    | 92  | AQ | 178-2-31  | 156 | AQ | 180-39   | 220 | AT | TN02-5   |
| 29 | AI | 5044    | 93  | AQ | 178-2-35  | 157 | AQ | 180-40   | 221 | AT | TN02-63  |
| 30 | AI | 5045    | 94  | AQ | 178-2-36  | 158 | AQ | 180-41   | 222 | AT | TN02-88  |
| 31 | AW | 5017    | 95  | AQ | 178-2-38  | 159 | AQ | 180-45   | 223 | AT | TN02-9   |
| 32 | AW | 5018    | 96  | AQ | 178-2-39  | 160 | AQ | 180-46   | 224 | AT | TN02-N46 |
| 33 | AW | 5019    | 97  | AQ | 178-2-40  | 161 | AQ | 180-52   | 225 | AT | TN02-N57 |
| 34 | AW | 5020    | 98  | AQ | 178-2-43  | 162 | AQ | 181-1    | 226 | AT | TN03-N10 |
| 35 | AW | 5021    | 99  | AQ | 178-2-56  | 163 | AQ | 181-2    | 227 | AT | TN03-N22 |
| 36 | AW | 5022    | 100 | AQ | 178-2-57  | 164 | AQ | 182-2    | 228 | AT | TN03-N27 |
| 37 | AW | 5023    | 101 | AQ | 178-2-58  | 165 | AQ | 182-3    | 229 | AT | TN03-N28 |
| 38 | AW | 5025    | 102 | AQ | 178-2-59  | 166 | AQ | 182-4    | 230 | AT | TN03-N34 |
| 39 | AW | 5027    | 103 | AQ | 178-2-69  | 167 | AQ | 183-1    | 231 | AT | TN03-N49 |
| 40 | AW | 5030    | 104 | AQ | 178-2-82  | 168 | AQ | 183-2    | 232 | AT | TN03-N5  |
| 41 | AW | 5031    | 105 | AQ | 178-2-88  | 169 | AL | LA01-N2  | 233 | AT | TN03-N50 |
| 42 | AW | 5032    | 106 | AQ | 178-2-94  | 170 | AL | LA01-N3  | 234 | AT | TN03-N51 |
| 43 | AW | 5034    | 107 | AQ | 178-2-98  | 171 | AL | LA01-N30 | 235 | AT | TN03-N55 |
| 44 | AW | 5035    | 108 | AQ | 178-2-106 | 172 | AL | LA03-N1  | 236 | AT | TN03-N59 |
| 45 | AQ | 174-1-2 | 109 | AQ | 178-2-110 | 173 | AL | LA03-N3  | 237 | AT | TN03-N7  |
| 46 | AQ | 174-1-3 | 110 | AQ | 178-2-114 | 174 | AL | LA04-N19 | 238 | AT | TN04-13  |
| 47 | AQ | 174-1-4 | 111 | AQ | 178-2-122 | 175 | AL | LA04-N49 | 239 | AT | TN04-15  |

|    |    |          |     |    |           |     |    |          |     |    |          |
|----|----|----------|-----|----|-----------|-----|----|----------|-----|----|----------|
| 48 | AQ | 174-1-5  | 112 | AQ | 178-2-123 | 176 | AL | LA04-N53 | 240 | AT | TN04-22  |
| 49 | AQ | 174-1-6  | 113 | AQ | 178-2-124 | 177 | AL | LA04-N56 | 241 | AT | TN04-29  |
| 50 | AQ | 174-1-7  | 114 | AQ | 178-2-125 | 178 | AL | LA05-N15 | 242 | AT | TN04-N32 |
| 51 | AQ | 174-1-8  | 115 | AQ | 178-2-141 | 179 | AL | LA05-N19 | 243 | AT | TN04-N46 |
| 52 | AQ | 174-1-9  | 116 | AQ | 178-2-149 | 180 | AL | LA05-N25 | 244 | AT | TN05-N13 |
| 53 | AQ | 174-1-12 | 117 | AQ | 178-2-153 | 181 | AL | LA05-N27 | 245 | AT | TN05-N14 |
| 54 | AQ | 174-1-13 | 118 | AQ | 178-2-157 | 182 | AL | LA05-N39 | 246 | AT | TN05-N21 |
| 55 | AQ | 174-1-14 | 119 | AQ | 178-2-160 | 183 | AL | LA05-N5  | 247 | AT | TN05-N4  |
| 56 | AQ | 174-1-15 | 120 | AQ | 178-2-162 | 184 | AL | LA05-N50 | 248 | AT | TN05-N41 |
| 57 | AQ | 174-1-17 | 121 | AQ | 178-2-164 | 185 | AL | LA05-N6  | 249 | AT | TN05-N46 |
| 58 | AQ | 174-2-1  | 122 | AQ | 178-2-165 | 186 | AL | LA06-N12 | 250 | AT | TN05-N47 |
| 59 | AQ | 174-2-3  | 123 | AQ | 178-2-171 | 187 | AL | LA06-N27 | 251 | AT | TN05-N48 |
| 60 | AQ | 174-2-5  | 124 | AQ | 178-2-172 | 188 | AL | LA06-N30 | 252 | AT | TN05-N49 |
| 61 | AQ | 174-2-7  | 125 | AQ | 178-2-180 | 189 | AL | LA06-N41 | 253 | AT | TN05-N53 |
| 62 | AQ | 174-3-1  | 126 | AQ | 178-2-184 | 190 | AL | LA07-N10 | 254 | AT | TN05-N59 |
| 63 | AQ | 174-3-2  | 127 | AQ | 178-2-186 | 191 | AL | LA07-N28 | 255 | AT | TN05-N60 |
| 64 | AQ | 174-3-3  | 128 | AQ | 178-2-190 | 192 | AL | LA07-N30 | 256 | AT | TN05-N8  |

---

**Table S2.** Clonal character ranking of *P. deltoides*.

| Trait               | Genotype number  | Mean ± standard deviation | Provenance | Ranking | Trait                          | Genotype number | Mean ± standard deviation | Provenance | Ranking |
|---------------------|------------------|---------------------------|------------|---------|--------------------------------|-----------------|---------------------------|------------|---------|
| Height /cm          | <u>LA05-N15</u>  | 111.00±3.00               | AL         | 1       | $\delta^{13}\text{C}/\text{‰}$ | LA08-N52        | -28.168±0.29              | AL         | 1       |
|                     | <u>LA05-N25</u>  | 108.67±6.11               | AL         | 2       |                                | LA08-N21        | -28.240±0.51              | AL         | 2       |
|                     | TN01-92          | 106.67±10.21              | AT         | 3       |                                | TN05-N4         | -28.296±0.74              | AT         | 3       |
|                     | <u>178-2-106</u> | 104.67±15.57              | AQ         | 4       |                                | TN02-N46        | -28.314±0.44              | AT         | 4       |
|                     | <u>174-1-2</u>   | 98.33±1.53                | AQ         | 5       |                                | 179-2           | -28.794±0.49              | AQ         | 5       |
|                     | 5023             | 98.00±3.61                | AW         | 6       |                                | 178-2-88        | -28.804±0.09              | AQ         | 6       |
|                     | <u>TN02-112</u>  | 97.33±21.22               | AT         | 7       |                                | TN01-N58        | -28.831±0.32              | AT         | 7       |
|                     | <u>178-2-141</u> | 97.00±32.42               | AQ         | 8       |                                | 174-3-5         | -28.832±0.03              | AQ         | 8       |
|                     | LA06-N12         | 94.67±16.20               | AL         | 9       |                                | 5036            | -28.856±0.82              | AI         | 9       |
|                     | LA08-N1          | 94.33±25.50               | AL         | 10      |                                | TN02-N57        | -28.934±0.99              | AT         | 10      |
| Ground Diameter /mm | <u>178-2-141</u> | 13.11±2.20                | AQ         | 1       | $\delta^{15}\text{N}/\text{‰}$ | 491             | 4.200±1.36                | AM         | 1       |
|                     | <u>178-2-106</u> | 11.54±0.86                | AQ         | 2       |                                | 179-6           | 3.596±1.81                | AQ         | 2       |
|                     | 174-1-6          | 10.84±0.67                | AQ         | 3       |                                | <u>174-1-2</u>  | 3.531±0.46                | AQ         | 3       |
|                     | <u>LA05-N15</u>  | 10.50±1.03                | AL         | 4       |                                | 178-2-184       | 1.659±0.09                | AQ         | 4       |
|                     | <u>LA01-N3</u>   | 10.22±1.84                | AL         | 5       |                                | 178-2-58        | 1.624±3.59                | AQ         | 5       |
|                     | LA06-N12         | 10.18±1.03                | AL         | 6       |                                | LA09-N23        | 1.373±0.16                | AL         | 6       |
|                     | <u>LA07-N6</u>   | 10.13±1.83                | AL         | 7       |                                | 5044            | 1.314±0.44                | AI         | 7       |
|                     | <u>LA09-N23</u>  | 10.12±0.76                | AL         | 8       |                                | LA05-N27        | 1.184±1.26                | AL         | 8       |
|                     | <u>LA05-N25</u>  | 9.91±1.62                 | AL         | 9       |                                | 175-1-2         | 0.990±1.38                | AQ         | 9       |
|                     | LA05-N27         | 9.85±1.64                 | AL         | 10      |                                | TN02-5          | 0.982±0.44                | AT         | 10      |
| Total               | <u>178-2-141</u> | 45.06±15.71               | AQ         | 1       | Total                          | <u>TN02-112</u> | 34.53±8.81                | AT         | 7       |
| <u>Biomass /g</u>   | <u>178-2-106</u> | 44.12±6.02                | AQ         | 2       | <u>Biomass /g</u>              | <u>174-1-2</u>  | 33.64±5.14                | AQ         | 8       |

|                 |             |    |   |                 |             |    |    |
|-----------------|-------------|----|---|-----------------|-------------|----|----|
| <u>LA05-N25</u> | 36.80±10.91 | AL | 3 | TN05-N8         | 33.44±2.20  | AT | 9  |
| <u>LA05-N15</u> | 35.82±1.37  | AL | 4 | TN05-N14        | 33.38±4.80  | AT | 10 |
| <u>LA07-N6</u>  | 35.81±9.63  | AL | 5 | LA08-N1         | 33.06±11.27 | AL | 11 |
| <u>LA01-N3</u>  | 34.67±13.68 | AL | 6 | <u>LA09-N23</u> | 32.89±7.74  | AL | 12 |

---

<sup>1</sup> The underline indicates that the genotype has two or more excellent single traits.
